# Supplementary material
Source: PubMed Central journal article supplement (PMC7324173)
Supplement: jci-130-130176-s120.pdf [file jci-130-130176-s120.pdf]

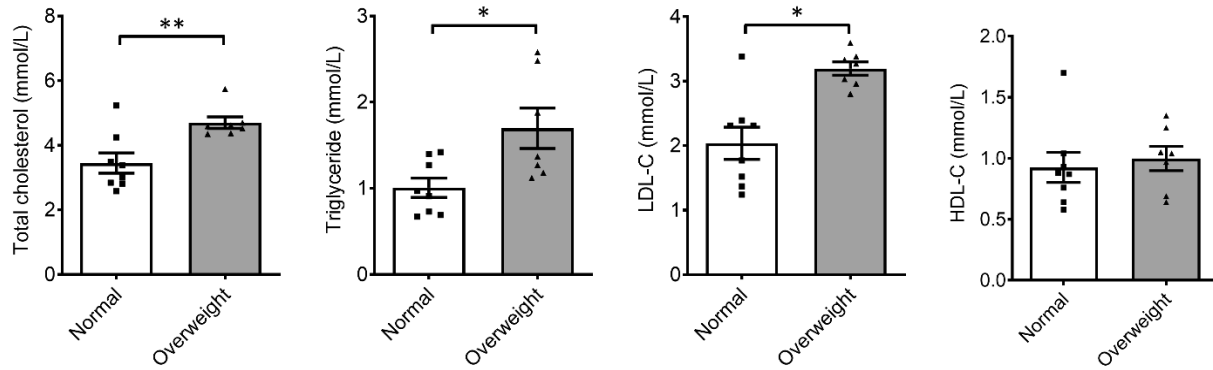

**Supplemental Figure 1** The serum level of total cholesterol, triglyceride, low-density lipoprotein-cholesterol (LDL-C) and high-density lipoprotein-cholesterol (HDL-C) in normal weight and overweight subjects. Normal subjects: n=8, Overweight subjects: n=7. \* $p < 0.05$ , \*\* $p < 0.01$ .

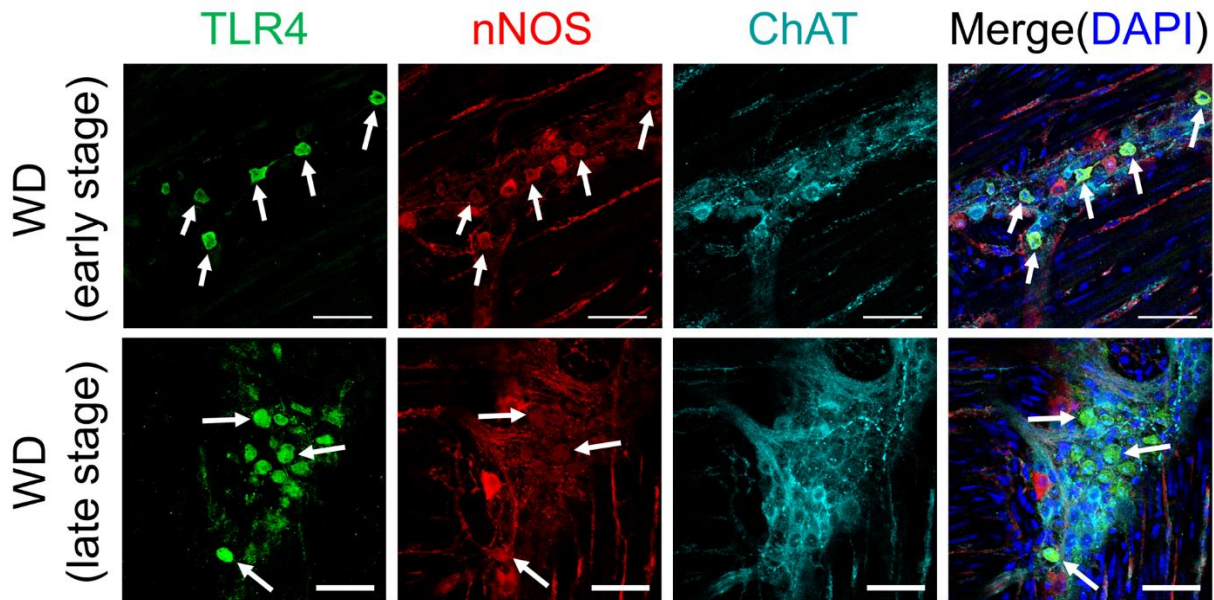

**Supplemental Figure 2** TLR4 expression in early and late stage of enteric neuronal pyroptosis in WD-fed mice. 6-week-old CF-1 mice were fed with a WD for 12 weeks. Representative images of TLR4, nNOS and ChAT staining of proximal colon are shown (The photographs of late stage row are also used in Figure 4A).
